# Supplementary material for: NT-PGC-1α deficiency attenuates high-fat diet-induced obesity by modulating food intake, fecal fat excretion and intestinal fat absorption
Source: PubMed Central journal article supplement (PMC7809341; doi:10.1038/s41598-020-79823-9), 2021-01-14
Supplement: 41598_2020_79823_MOESM1_ESM.pdf [file 41598_2020_79823_MOESM1_ESM.pdf]

# NT-PGC-1 $\alpha$ deficiency attenuates high-fat diet-induced obesity by modulating food intake, fecal fat excretion and intestinal fat absorption

Jihyun Kim<sup>1\*</sup>, Jiyoung Moon<sup>1\*</sup>, Chul-Hong Park<sup>1</sup>, Jisu Lee<sup>1</sup>, Helia Cheng<sup>1</sup>, Z. Elizabeth Floyd<sup>2</sup>,  
Ji Suk Chang<sup>1</sup>

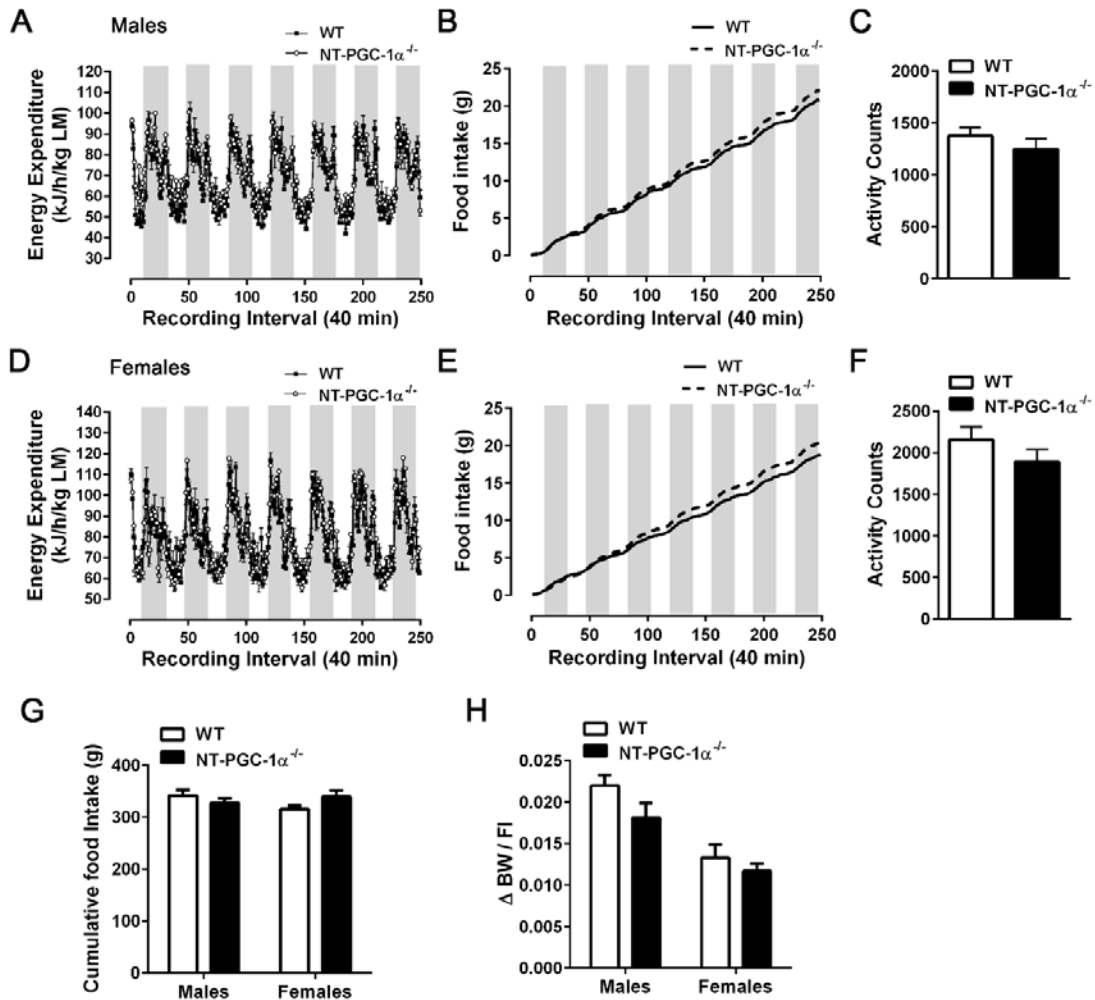

**Supplementary Figure S1. Caloric intake and energy metabolism in NT-PGC-1 $\alpha$ <sup>-/-</sup> mice fed a chow diet.** (A-F) Energy expenditure, food intake, and average locomotor activity of male and female WT and NT-PGC-1 $\alpha$ <sup>-/-</sup> mice fed a chow diet (n=11 per group). (G) Cumulative food intake of male and female WT and NT-PGC-1 $\alpha$ <sup>-/-</sup> mice during chow feeding (n=11 per group). (H) Cumulative weight (g) gained over 16 weeks divided by the cumulative food intake (g/mouse) over the same period on chow (n=11 per group).

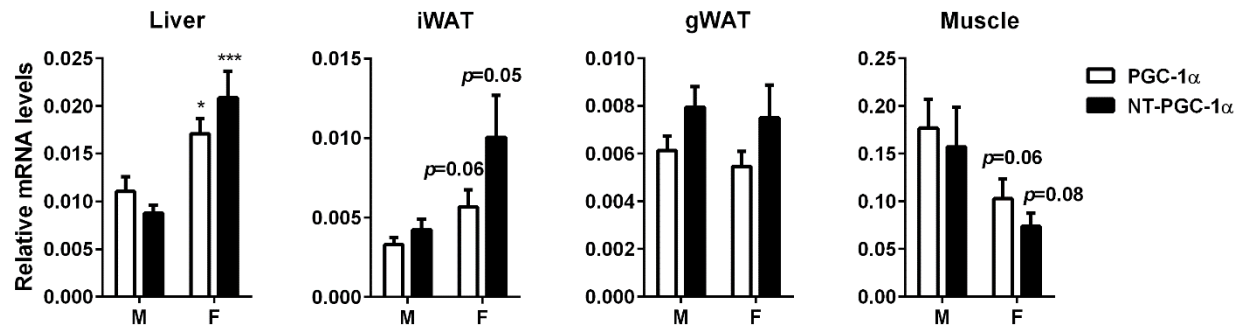

**Supplementary Figure S2. Differential expression of PGC-1 $\alpha$  and NT-PGC-1 $\alpha$  in a sex- and tissue-specific manner.** Quantitative qPCR analysis of PGC-1 $\alpha$  and NT-PGC-1 $\alpha$  in liver, iWAT, gWAT, and muscle from HFD-fed male and female WT mice (n=10-12 per group). Data are presented as the mean  $\pm$  SEM. \* $P < 0.05$ , \*\*\* $P < 0.001$  determined by Student's  $t$  test.

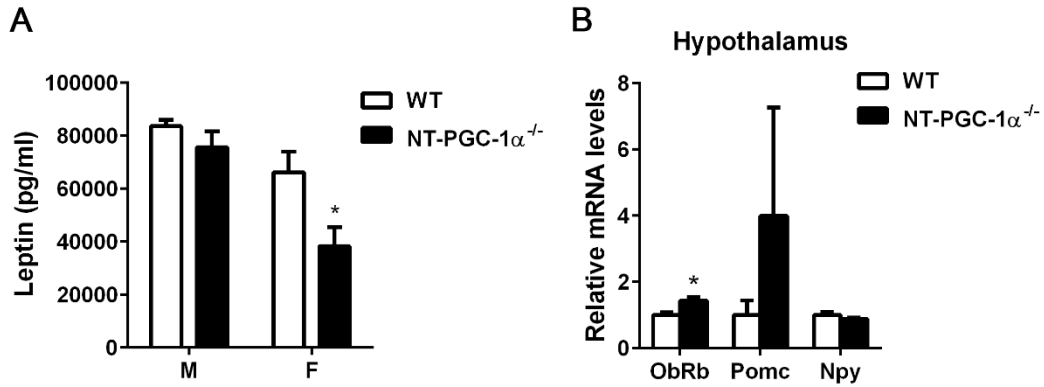

**Supplementary Figure S3. Effect of NT-PGC-1 $\alpha$  ablation on circulating leptin levels and hypothalamic gene expression.** (A) Serum leptin levels in HFD-fed male and female WT and NT-PGC-1 $\alpha$ <sup>-/-</sup> mice (n=10 per group). (B) Quantitative qPCR analysis of hypothalamic genes in HFD-fed female WT and NT-PGC-1 $\alpha$ <sup>-/-</sup> mice (n=7 per group). All data are presented as the mean  $\pm$  SEM. \* $P < 0.05$  determined by Student's  $t$  test.

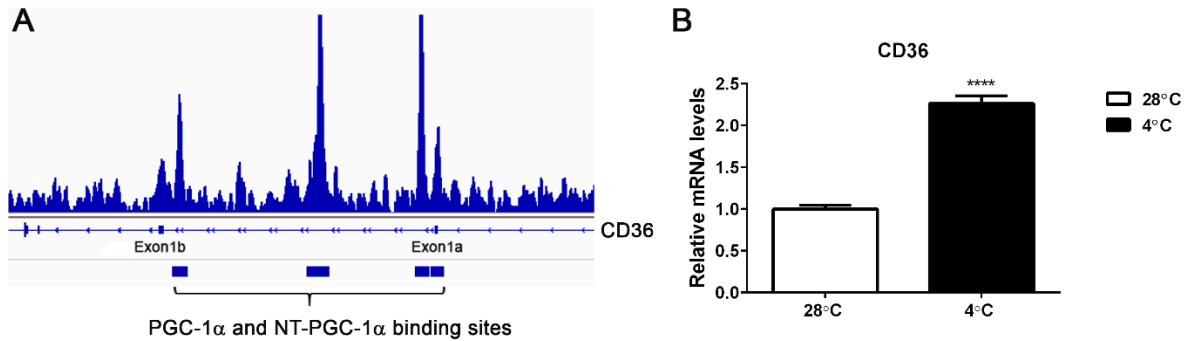

**Supplementary Figure S4. Chromatin occupancy of PGC-1 $\alpha$  and NT-PGC-1 $\alpha$  at the CD36 gene promoters in brown adipose tissue.** (A) ChIP-seq with PGC-1 $\alpha$  antibody recognizing both PGC-1 $\alpha$  and NT-PGC-1 $\alpha$ . Four small boxes represent the binding sites for PGC-1 $\alpha$  and/or NT-PGC-1 $\alpha$  at the CD36 gene promoters in cold-activated BAT. (B) Enrichment of PGC-1 $\alpha$  and NT-PGC-1 $\alpha$  at the CD36 gene promoters is accordant with a cold-dependent increase in CD36 gene expression in BAT (n=6 per group). Data are presented as the mean  $\pm$  SEM. \*\*\*\* $P < 0.0001$  determined by Student's  $t$  test.
